# Supplementary material for: Iodophor-catalyzed sulfenylation of indoles with sulfonyl hydrazides for the synthesis of 3-sulfenylindoles
Source: Royal Society of Chemistry journal article supplement (doi:10.1039/d4ra05383d), 2024-01-01

**Iodophor-Catalyzed Sulfenylation of Indoles with Sulfonyl  
Hydrazides for the Synthesis of 3-Sulfenylindoles**  
**Supporting Information**

**Table of Contents**

|                                             |   |
|---------------------------------------------|---|
| Characterization data of the products ..... | 2 |
| References.....                             | 5 |
| NMR spectra .....                           | 6 |

## Characterization data of the products

### [3-(phenylthio)-1H-indole] [3a]<sup>[1]</sup>

<sup>1</sup>H NMR (400 MHz, CDCl<sub>3</sub>)  $\delta$  8.34 (s, 1H), 7.62 (d,  $J$  = 7.9 Hz, 1H), 7.44 (dd,  $J$  = 13.2, 5.3 Hz, 2H), 7.26 (dd,  $J$  = 13.3, 5.3 Hz, 1H), 7.15 (ddd,  $J$  = 18.1, 11.7, 4.9 Hz, 5H), 7.05 (t,  $J$  = 7.0 Hz, 1H).

### [3-((4-Fluorophenyl)thio)-1H-indole] [3b]<sup>[1]</sup>

<sup>1</sup>H NMR (400 MHz, CDCl<sub>3</sub>)  $\delta$  8.40 (s, 1H), 7.60 (d,  $J$  = 7.9 Hz, 1H), 7.48 (d,  $J$  = 2.6 Hz, 1H), 7.44 (d,  $J$  = 8.2 Hz, 1H), 7.30 – 7.25 (m, 1H), 7.18 (t,  $J$  = 7.5 Hz, 1H), 7.10 (dd,  $J$  = 8.9, 5.1 Hz, 2H), 6.87 (t,  $J$  = 8.8 Hz, 2H).

### [3-((4-Bromophenyl)thio)-1H-indole] [3c]<sup>[1]</sup>

<sup>1</sup>H NMR (400 MHz, CDCl<sub>3</sub>)  $\delta$  8.38 (s, 1H), 7.55 (d,  $J$  = 7.4 Hz, 1H), 7.47 – 7.41 (m, 2H), 7.24 (dd,  $J$  = 10.2, 3.6 Hz, 3H), 7.16 (t,  $J$  = 7.5 Hz, 1H), 6.94 (dd,  $J$  = 8.7, 2.2 Hz, 2H).

### [3-((4-(Trifluoromethyl)phenyl)thio)-1H-indole] [3d]<sup>[1]</sup>

<sup>1</sup>H NMR (400 MHz, CDCl<sub>3</sub>)  $\delta$  8.49 (s), 7.59 (d,  $J$  = 7.9 Hz), 7.51 (d,  $J$  = 2.6 Hz), 7.48 (d,  $J$  = 8.2 Hz), 7.40 (d,  $J$  = 8.3 Hz), 7.32 (t,  $J$  = 7.6 Hz), 7.21 (t,  $J$  = 7.5 Hz), 7.16 (d,  $J$  = 8.2 Hz).

### [3-((4-(Trifluoromethoxy)phenyl)thio)-1H-indole] [3e]<sup>[1]</sup>

<sup>1</sup>H NMR (400 MHz, CDCl<sub>3</sub>)  $\delta$  8.51 (s, 1H), 7.61 (d,  $J$  = 7.9 Hz, 1H), 7.49 (d,  $J$  = 2.6 Hz, 1H), 7.46 (d,  $J$  = 8.2 Hz, 1H), 7.32 – 7.28 (m, 1H), 7.20 (t,  $J$  = 7.5 Hz, 1H), 7.10 (d,  $J$  = 8.9 Hz, 1H), 7.02 (d,  $J$  = 8.2 Hz, 2H).

### [3-((4-Nitrophenyl)thio)-1H-indole] [3f]<sup>[1]</sup>

<sup>1</sup>H NMR (400 MHz, CDCl<sub>3</sub>)  $\delta$  8.72 (s, 1H), 8.02 – 7.97 (m, 1H), 7.53 (dd,  $J$  = 14.3, 6.6 Hz, 2H), 7.31 (d,  $J$  = 7.1 Hz, 1H), 7.19 (d,  $J$  = 7.1 Hz, 1H), 7.13 (d,  $J$  = 9.0 Hz, 1H).

### [3-(p-tolylthio)-1H-indole] [3g]<sup>[1]</sup>

<sup>1</sup>H NMR (400 MHz, CDCl<sub>3</sub>)  $\delta$  8.36 (s, 1H), 7.62 (d,  $J$  = 7.9 Hz, 1H), 7.48 (d,  $J$  = 2.4 Hz, 1H), 7.43 (d,  $J$  = 8.2 Hz, 1H), 7.26 (t,  $J$  = 7.6 Hz, 2H), 7.16 (t,  $J$  = 7.5 Hz, 1H), 7.04 (d,  $J$  = 8.3 Hz, 2H), 6.98 (d,  $J$  = 8.1 Hz, 2H), 2.25 (s, 3H).

### [3-((4-Methoxyphenyl)thio)-1H-indole] [3h]<sup>[1]</sup>

<sup>1</sup>H NMR (400 MHz, CDCl<sub>3</sub>)  $\delta$  8.35 (s, 1H), 7.63 (d,  $J$  = 8.0 Hz, 1H), 7.44 (d,  $J$  = 2.5 Hz, 1H), 7.40 (d,  $J$  = 8.1 Hz, 1H), 7.25 (t,  $J$  = 7.0 Hz, 1H), 7.16 – 7.12 (m, 3H), 6.74 (d,  $J$  = 8.9 Hz, 2H), 3.72 (s, 3H).

### [3-(o-tolylthio)-1H-indole] [3i]<sup>[2]</sup>

<sup>1</sup>H NMR (400 MHz, CDCl<sub>3</sub>)  $\delta$  8.37 (s, 1H), 7.57 (d,  $J$  = 7.9 Hz, 1H), 7.42 (d,  $J$  = 8.6

Hz, 2H), 7.26 (d,  $J = 17.6$  Hz, 2H), 7.14 (dd,  $J = 15.2, 7.5$  Hz, 2H), 6.96 (t,  $J = 6.8$  Hz, 1H), 6.88 (t,  $J = 7.4$  Hz, 1H), 6.71 (d,  $J = 7.8$  Hz, 1H), 2.49 (s, 3H).

**[3-((2-fluorophenyl)thio)-1H-indole] [3j]**<sup>[2]</sup>

<sup>1</sup>H NMR (400 MHz, CDCl<sub>3</sub>)  $\delta$  8.42 (s, 1H), 7.61 (s, 1H), 7.51 (d,  $J = 3.6$  Hz, 1H), 7.44 (d,  $J = 3.7$  Hz, 1H), 7.25 (s, 1H), 7.21-7.17 (m, 1H), 7.03 (d,  $J = 6.5$  Hz, 1H), 6.87 – 6.82 (m, 1H), 6.81 – 6.75 (m, 1H).

**[3-((3-bromophenyl)thio)-1H-indole] [3k]**<sup>[1]</sup>

<sup>1</sup>H NMR (400 MHz, CDCl<sub>3</sub>)  $\delta$  8.38 (s, 1H), 7.55 (d,  $J = 7.9$  Hz, 1H), 7.44 (d,  $J = 2.5$  Hz, 1H), 7.40 (d,  $J = 8.2$  Hz, 1H), 7.24 (t,  $J = 7.5$  Hz, 1H), 7.21-7.12 (m, 3H), 6.96 (d,  $J = 5.1$  Hz, 2H).

**[3-((2,5-Dimethylphenyl)thio)-1H-indole] [3l]**<sup>[3]</sup>

<sup>1</sup>H NMR (400 MHz, CDCl<sub>3</sub>)  $\delta$  8.36 (s, 1H), 7.52 (d,  $J = 7.9$  Hz, 1H), 7.40-7.35 (m, 2H), 7.20 (dt,  $J = 5.8, 3.0$  Hz, 1H), 7.11-7.06 (m, 1H), 6.94 (d,  $J = 7.6$  Hz, 1H), 6.71 (d,  $J = 8.3$  Hz, 1H), 6.50 (s, 1H), 2.38 (s, 3H), 1.97 (s, 3H).

**[3-((2,4-dichlorophenyl)thio)-1H-indole] [3m]**<sup>[1]</sup>

<sup>1</sup>H NMR (400 MHz, CDCl<sub>3</sub>)  $\delta$  8.41 (s, 1H), 7.47 (d,  $J = 7.9$  Hz, 1H), 7.42 (d,  $J = 2.5$  Hz, 1H), 7.39 (d,  $J = 8.2$  Hz, 1H), 7.26 (d,  $J = 2.0$  Hz, 1H), 7.24-7.19 (m, 1H), 7.11 (t,  $J = 7.5$  Hz, 1H), 6.81 (d,  $J = 8.6$  Hz, 1H), 6.48 (d,  $J = 8.6$  Hz, 1H).

**[3-((5-bromo-2-fluorophenyl)thio)-1H-indole] [3n]**

<sup>1</sup>H NMR (400 MHz, CDCl<sub>3</sub>)  $\delta$  8.39 (s, 1H), 7.51 (d,  $J = 7.9$  Hz, 1H), 7.43 (d,  $J = 2.5$  Hz, 1H), 7.38 (d,  $J = 8.1$  Hz, 1H), 7.21 (t,  $J = 7.3$  Hz, 1H), 7.15 – 7.09 (m, 2H), 6.89 (d,  $J = 8.4$  Hz, 1H), 6.54 (t,  $J = 8.3$  Hz, 1H). <sup>13</sup>C NMR (101 MHz, CDCl<sub>3</sub>)  $\delta$  136.32, 131.05, 128.83, 128.80, 128.63, 127.37, 127.34, 123.16, 121.04, 119.20, 118.59, 118.35, 111.58, 99.90. HRMS (APCI):  $m/z$  calcd for C<sub>14</sub>H<sub>9</sub>BrFNS<sub>2</sub>(M-H)<sup>+</sup> 320.9623, found: 320.9623.

**[Methyl 3-(phenylthio)-1H-indole-4-carboxylate] [4a]**<sup>[1]</sup>

<sup>1</sup>H NMR (400 MHz, CDCl<sub>3</sub>)  $\delta$  9.06 (s, 1H), 7.39 (s, 1H), 7.38 (d,  $J = 1.7$  Hz, 1H), 7.31 (d,  $J = 2.7$  Hz, 1H), 7.14 (t,  $J = 7.8$  Hz, 1H), 7.03 (d,  $J = 7.2$  Hz, 1H), 6.95 (d,  $J = 8.1$  Hz, 1H), 3.50 (s, 1H).

**[4-Nitro-3-(phenylthio)-1H-indole] [4b]**<sup>[1]</sup>

<sup>1</sup>H NMR (400 MHz, CDCl<sub>3</sub>)  $\delta$  9.07 (s, 1H), 7.66 (d,  $J = 8.4$  Hz, 1H), 7.61 (d,  $J = 8.2$  Hz, 1H), 7.51 (s, 1H), 7.20 (dd,  $J = 13.2, 5.4$  Hz, 2H), 7.08 (d,  $J = 7.2$  Hz, 2H), 7.02 (dd,  $J = 12.8, 5.0$  Hz, 3H).

**[3-(Phenylthio)-1H-indole-4-carbonitrile] [4c]**<sup>[1]</sup>

<sup>1</sup>H NMR (400 MHz, DMSO-*d*<sub>6</sub>)  $\delta$  12.32 (d,  $J = 9.5$  Hz, 1H), 8.04 (d,  $J = 2.8$  Hz, 1H), 7.84 (d,  $J = 8.2$  Hz, 1H), 7.56 (d,  $J = 6.6$  Hz, 1H), 7.32 (t,  $J = 7.8$  Hz, 1H), 7.25 – 7.18 (m, 1H), 7.08 (t,  $J = 7.3$  Hz, 1H), 7.03 (d,  $J = 7.2$  Hz, 2H).

**[7-Methyl-3-(phenylthio)-1*H*-indole] [4d]<sup>[1]</sup>**

<sup>1</sup>H NMR (400 MHz, CDCl<sub>3</sub>) δ 8.20 (s, 1H), 7.36 (d, *J* = 7.1 Hz, 1H), 7.30 (d, *J* = 2.6 Hz, 1H), 7.08 – 6.92 (m, 7H), 2.38 (s, 3H).

**[7-Methoxy-3-(phenylthio)-1*H*-indole] [4e]<sup>[1]</sup>**

<sup>1</sup>H NMR (400 MHz, CDCl<sub>3</sub>) δ 8.55 (s, 1H), 7.32 (d, *J* = 2.6 Hz, 1H), 7.12 (dd, *J* = 8.0 Hz, 1H), 7.08- 6.93 (m, 6H), 6.61 (d, *J* = 7.7 Hz, 1H), 3.87 (s, 3H).

**[5-methyl-3-(phenylthio)-1*H*-indole] [4f]<sup>[1]</sup>**

<sup>1</sup>H NMR (400 MHz, CDCl<sub>3</sub>) δ 8.20 (s, 1H), 7.33 (s, 2H), 7.20 (d, *J* = 8.3 Hz, 1H), 7.10-6.94 (m, 6H), 2.32 (s, 3H).

**[5-Chloro-3-(phenylthio)-1*H*-indole] [4g]<sup>[1]</sup>**

<sup>1</sup>H NMR (400 MHz, CDCl<sub>3</sub>) δ 8.38 (s, 1H), 7.52 (d, *J* = 1.9 Hz, 1H), 7.44 (d, *J* = 2.6 Hz, 1H), 7.28 (d, *J* = 8.6 Hz, 1H), 7.14 (dd, *J* = 8.6, 2.0 Hz, 1H), 7.09 (d, *J* = 6.7 Hz, 2H), 7.01 (d, *J* = 7.4 Hz, 3H).

**[6-Bromo-3-(phenylthio)-1*H*-indole] [4h]<sup>[1]</sup>**

<sup>1</sup>H NMR (400 MHz, CDCl<sub>3</sub>) δ 8.39 (s, 1H), 7.53 (d, *J* = 1.3 Hz, 1H), 7.40 (d, *J* = 7.7 Hz, 2H), 7.21 (dd, *J* = 8.4, 1.6 Hz, 1H), 7.15-7.09 (m, 2H), 7.03 (d, *J* = 8.2 Hz, 3H).

**[6-Fluoro-3-(phenylthio)-1*H*-indole] [4i]<sup>[1]</sup>**

<sup>1</sup>H NMR (400 MHz, CDCl<sub>3</sub>) δ 8.38 (s, 1H), 7.51 (dd, *J* = 8.7, 5.3 Hz, 1H), 7.47 (d, *J* = 2.5 Hz, 1H), 7.20 – 7.06 (m, 6H), 6.96-6.89 (m, 1H).

**[2-Methyl-3-(phenylthio)-1*H*-indole] [4j]<sup>[1]</sup>**

<sup>1</sup>H NMR (400 MHz, CDCl<sub>3</sub>) δ 8.08 (s, 1H), 7.46 (d, *J* = 7.4 Hz, 1H), 7.21 (d, *J* = 8.0 Hz, 1H), 7.14 – 7.00 (m, 4H), 6.98 – 6.90 (m, 3H), 2.37 (s, 3H).

**[5-Chloro-2-methyl-3-(phenylthio)-1*H*-indole] [4k]<sup>[1]</sup>**

<sup>1</sup>H NMR (400 MHz, CDCl<sub>3</sub>) δ 8.20 (s, 1H), 7.43 (d, *J* = 2.0 Hz, 1H), 7.17-7.13 (m, 1H), 7.06 (dt, *J* = 8.5, 4.7 Hz, 3H), 6.99-6.92 (m, 3H), 2.41 (s, 3H).

**[1-Methyl-3-(phenylthio)-1*H*-indole] [4l]<sup>[1]</sup>**

<sup>1</sup>H NMR (400 MHz, CDCl<sub>3</sub>) δ 7.68 (d, *J* = 8.0 Hz, 1H), 7.41 (d, *J* = 8.3 Hz, 1H), 7.35 (t, *J* = 8.2 Hz, 1H), 7.23 – 7.10 (m, 7H), 3.81 (s, 3H).

**[3-(Phenylthio)-1*H*-pyrrolo (2,3-*b*) pyridine] [4m]<sup>[1]</sup>**

<sup>1</sup>H NMR (400 MHz, CDCl<sub>3</sub>) δ 11.69 (s, 1H), 8.41 (d, *J* = 3.4 Hz, 1H), 7.96 (dd, *J* = 7.9, 1.4 Hz, 1H), 7.71 (s, 1H), 7.21-7.14 (m, 3H), 7.06-7.12 (m, 3H).

**[5-nitro-3-(phenylthio)-1*H*-indole][4n]**

<sup>1</sup>H NMR (400 MHz, CDCl<sub>3</sub>) δ 9.07 (s, 1H), 7.66 (d, *J* = 7.2 Hz, 1H), 7.61 (d, *J* = 8.7 Hz, 1H), 7.51 (s, 1H), 7.22 (d, *J* = 7.9 Hz, 1H), 7.12 – 7.06 (m, 2H), 7.01 (dd, *J* = 16.1, 7.2 Hz, 3H). <sup>13</sup>C NMR (101 MHz, CDCl<sub>3</sub>) δ 143.60, 139.28, 139.11, 135.20, 129.03, 127.14, 125.64, 122.21, 120.42, 118.10, 117.20, 103.76. HRMS (APCI): *m/z* calculated for C<sub>14</sub>H<sub>10</sub>N<sub>2</sub>NaO<sub>2</sub>S (M+H)<sup>+</sup> 271.0536, found: 271.0536

## References

- [1] L. Chen, J. Zhang, Y. Wei, Z. Yang, P. Liu, J. Zhang and Dai B. *Tetrahedron*. 2019, **75**, 130664.
- [2] F. L. Yang and S. K. Tian, *Angew. Chem., Int. Ed.*, 2013, **52**, 4929.
- [3] G. Kumaraswamy, R. Raju and Narayanarao V. *RSC Adv.*, 2015, **5**, 22718.

# NMR spectra

[3-(phenylthio)-1H-indole] [3a]  $^1\text{H}$  NMR (400 MHz,  $\text{CDCl}_3$ )

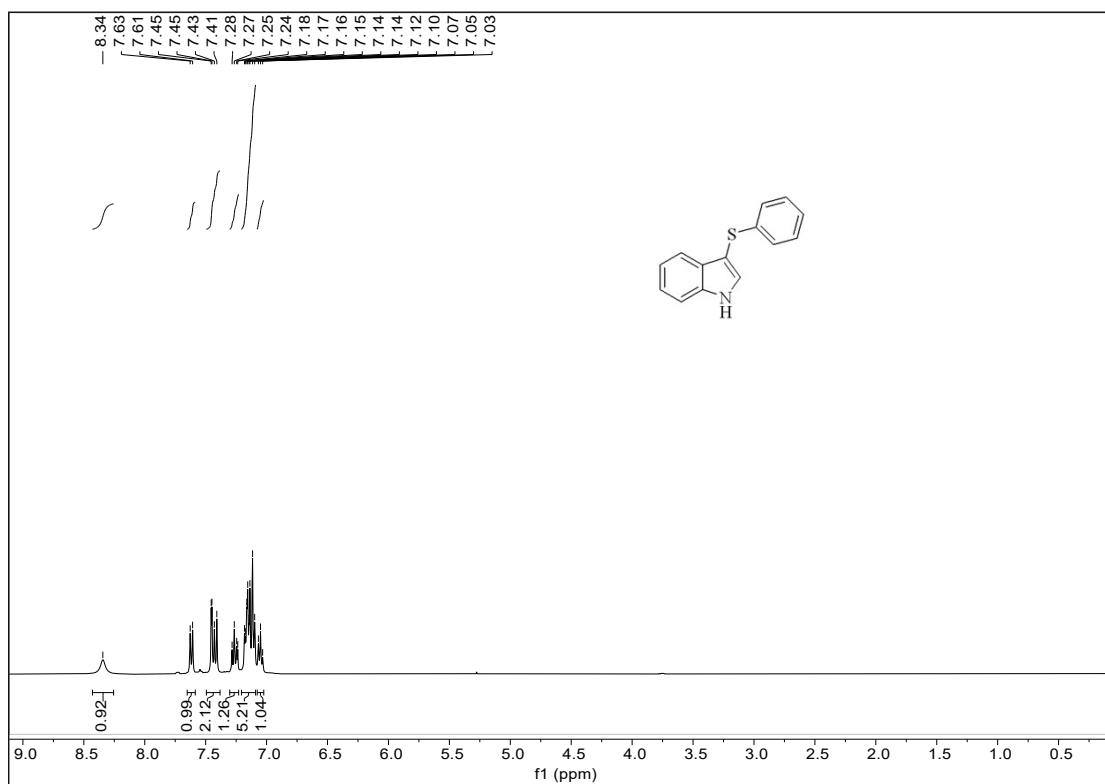

[3-((4-Fluorophenyl)thio)-1H-indole] [3b]  $^1\text{H}$  NMR (400 MHz,  $\text{CDCl}_3$ )

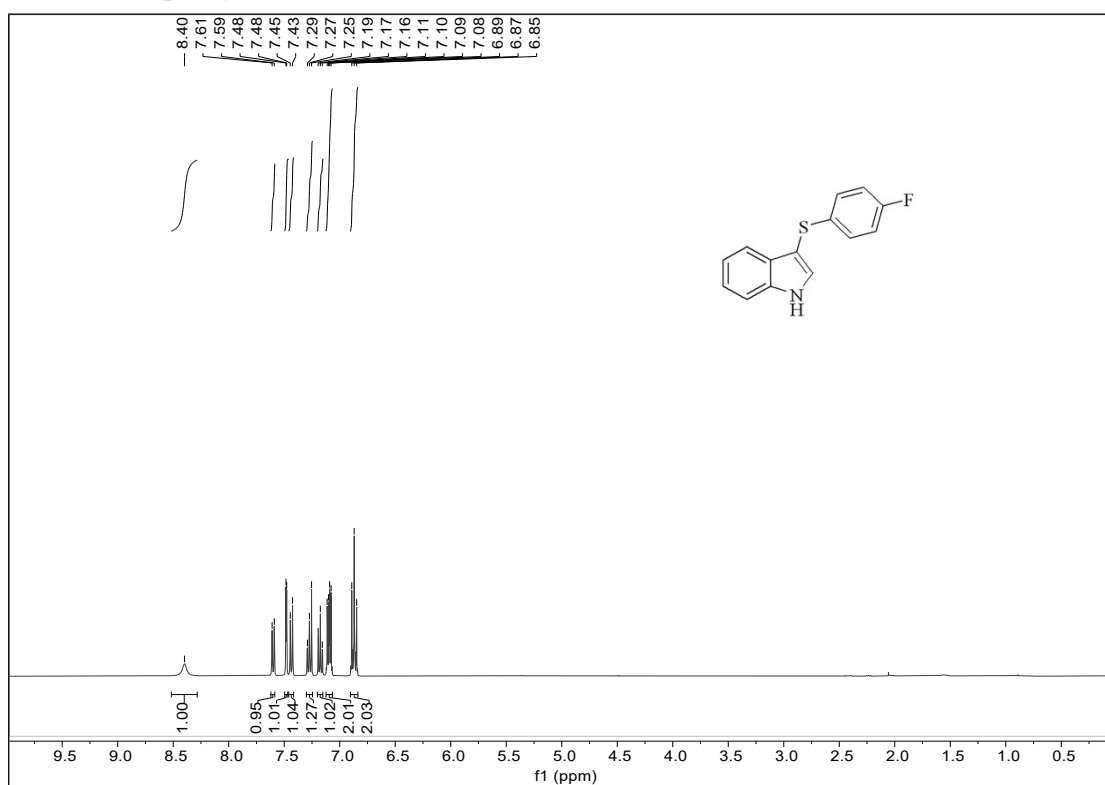

**[3-((4-Bromophenyl)thio)-1H-indole] [3c]**  $^1\text{H}$  NMR (400 MHz,  $\text{CDCl}_3$ )

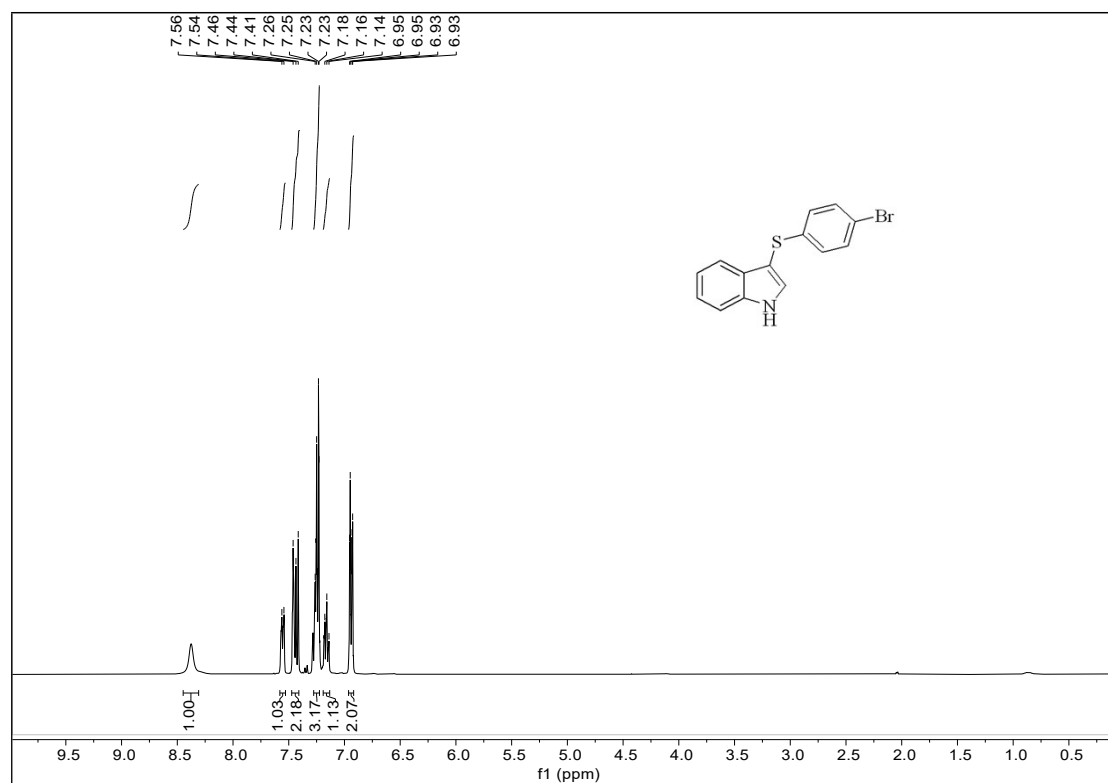

**[3-((4-(Trifluoromethyl)phenyl)thio)-1H-indole] [3d]**  $^1\text{H}$  NMR (400 MHz,  $\text{CDCl}_3$ )

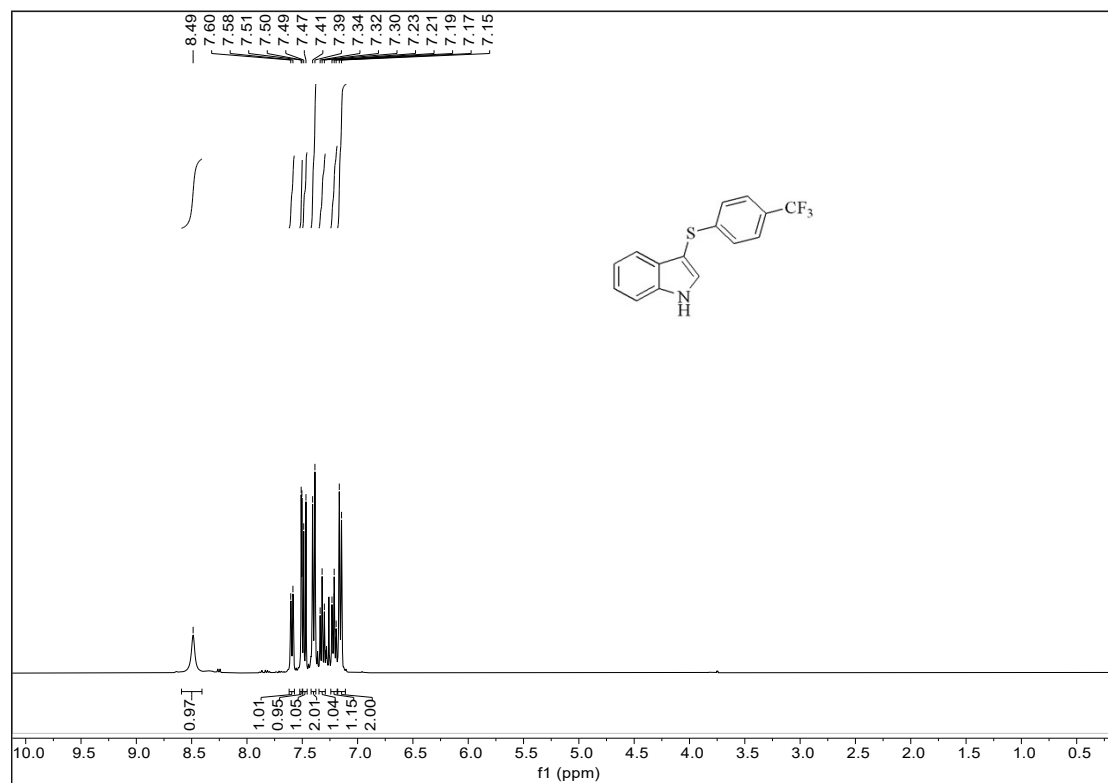

**[3-((4-Nitrophenyl)thio)-1H-indole] [3f]**  $^1\text{H NMR}$  (400 MHz,  $\text{CDCl}_3$ )

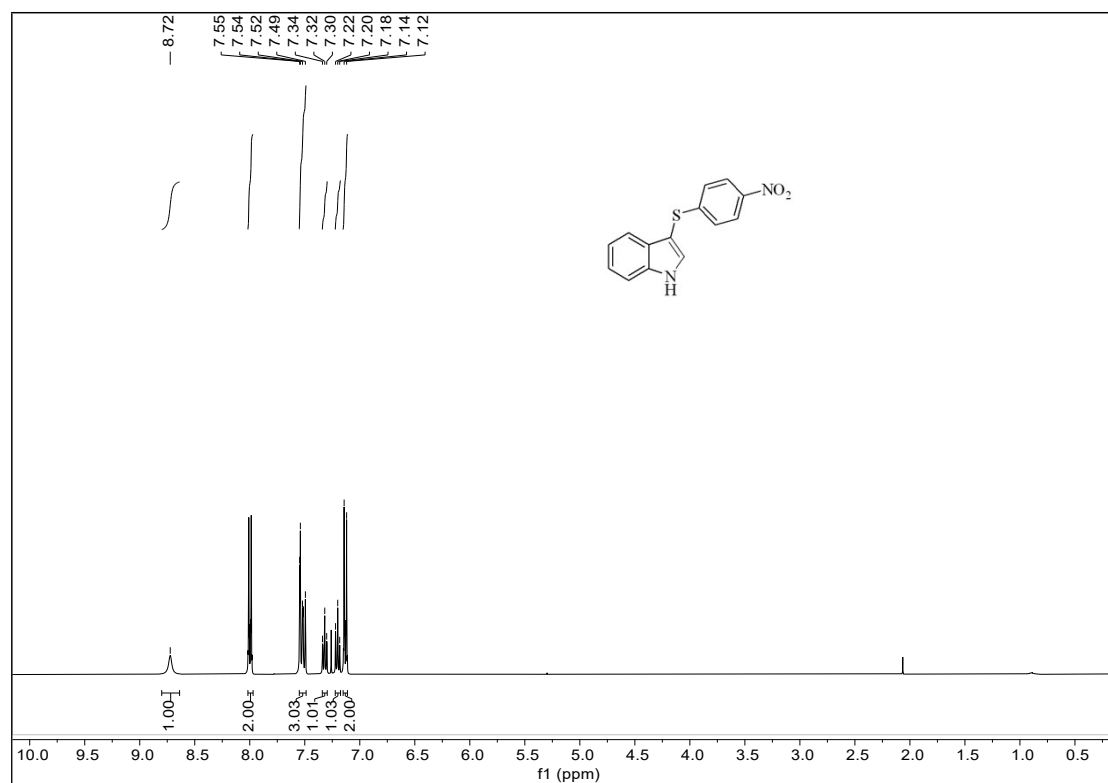

**[3-(P-tolylthio)-1H-indole] [3g]**  $^1\text{H NMR}$  (400 MHz,  $\text{CDCl}_3$ )

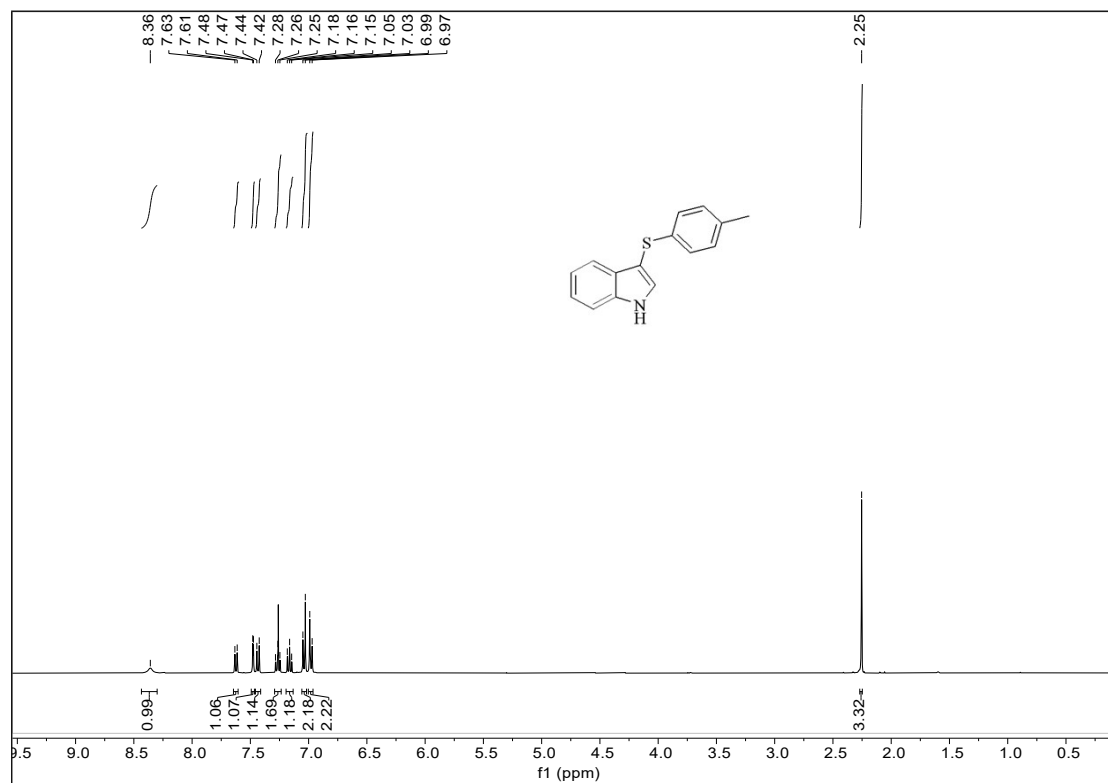



**[3-((4-Methoxyphenyl)thio)-1H-indole] [3h]**  $^1\text{H}$  NMR (400 MHz,  $\text{CDCl}_3$ )

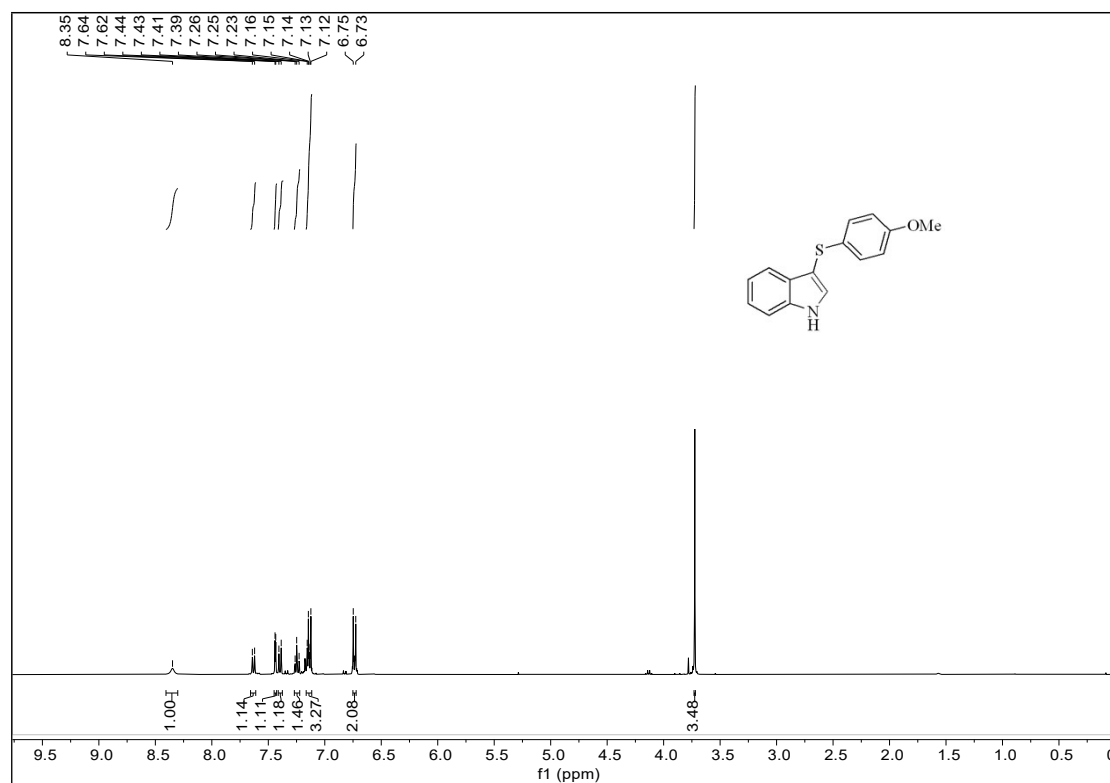

**[3-((3-bromophenyl)thio)-1H-indole] [3k]**  $^1\text{H}$  NMR (400 MHz,  $\text{CDCl}_3$ )

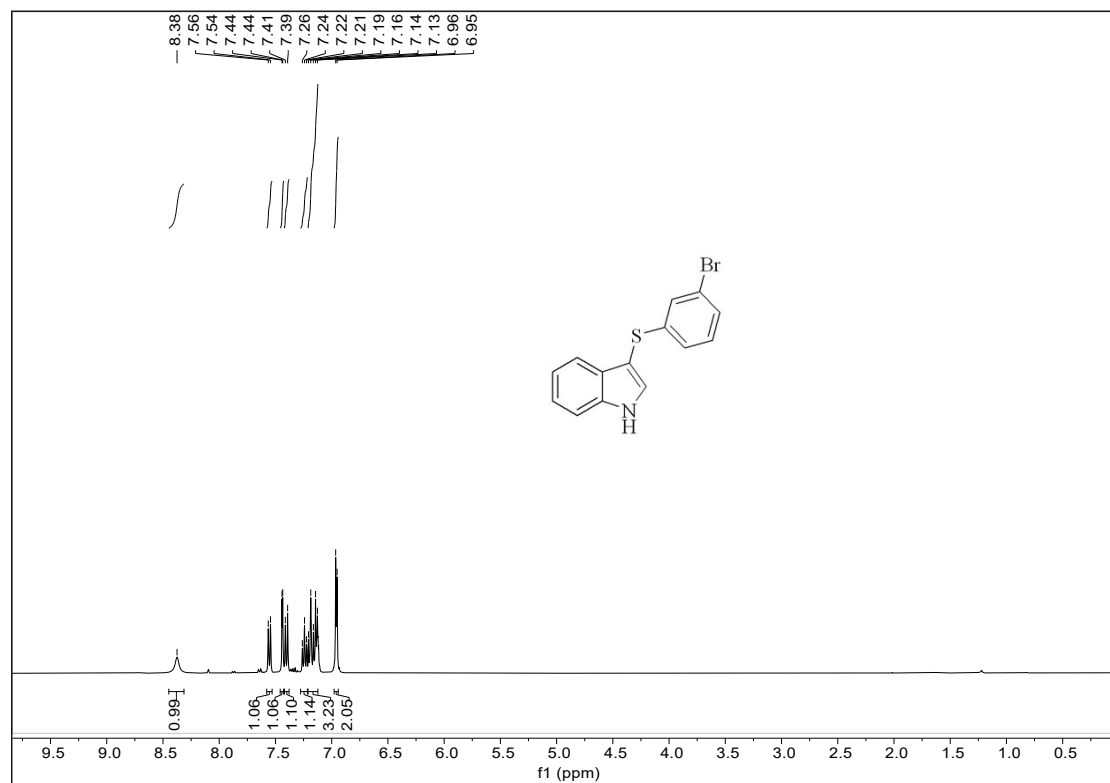

[3-((2,5-Dimethylphenyl)thio)-1H-indole] [3l] <sup>1</sup>H NMR (400 MHz, CDCl<sub>3</sub>)

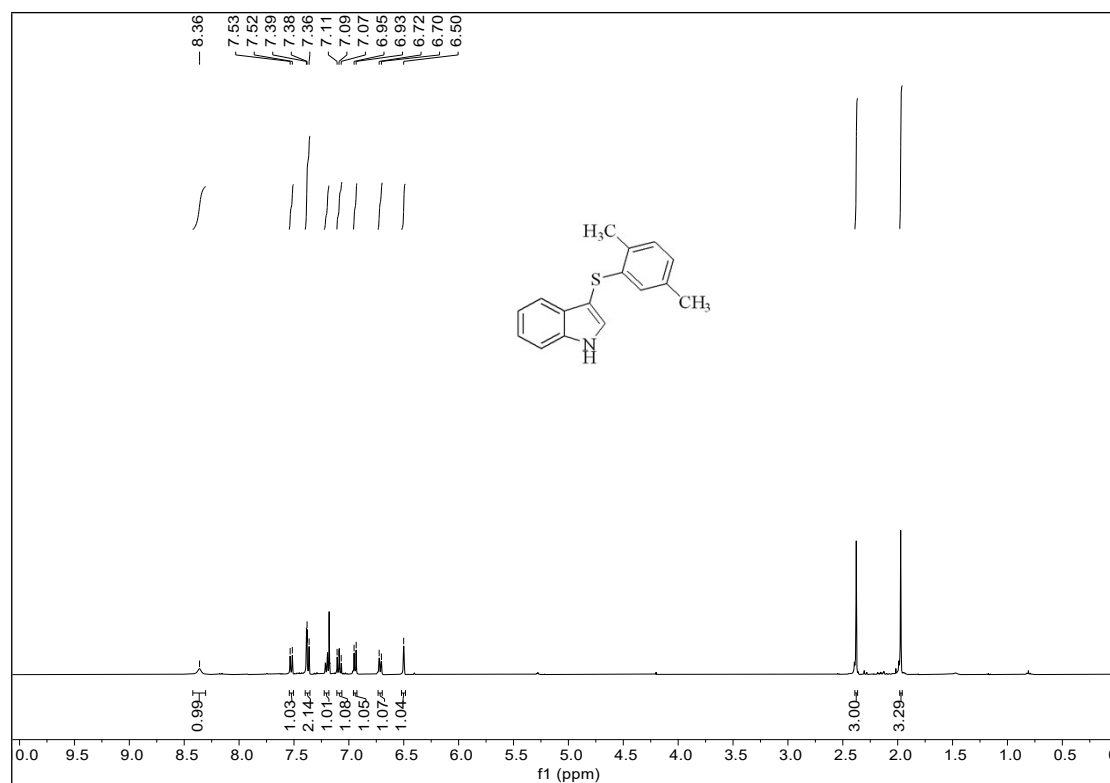

[3-((2,4-dichlorophenyl)thio)-1H-indole] [3m] <sup>1</sup>H NMR (400 MHz, CDCl<sub>3</sub>)

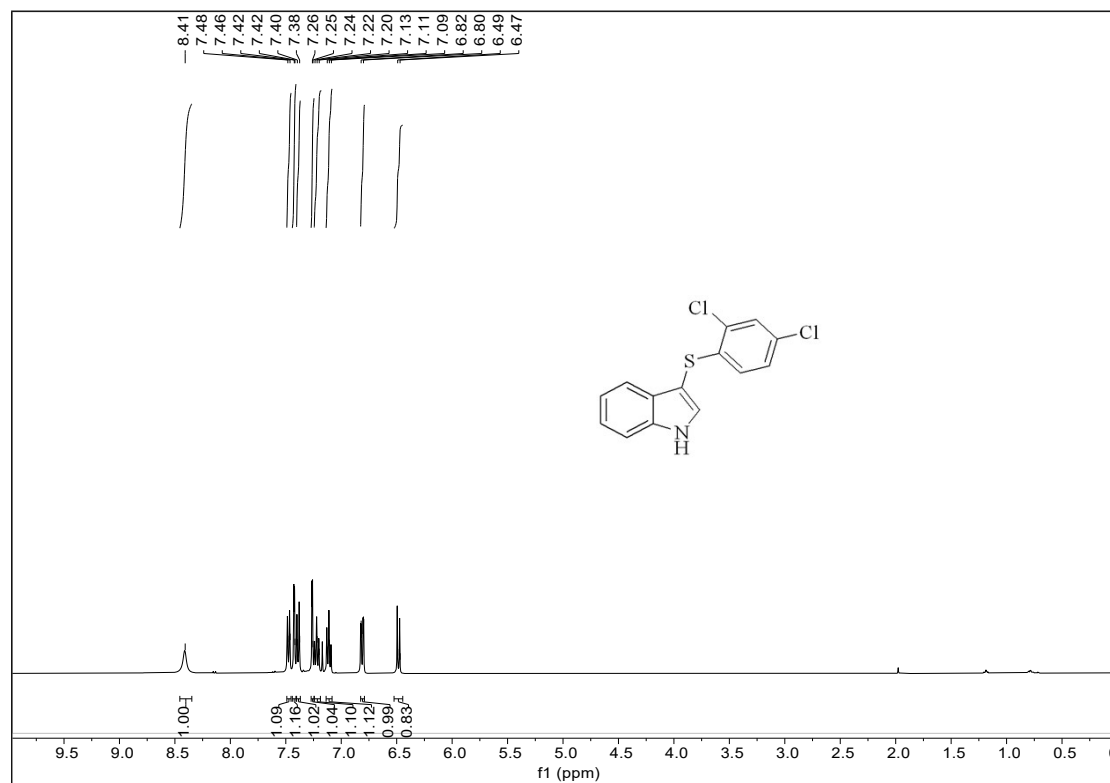

[3-((5-bromo-2-fluorophenyl)thio)-1H-indole] [3n] <sup>1</sup>H NMR (400 MHz, CDCl<sub>3</sub>)

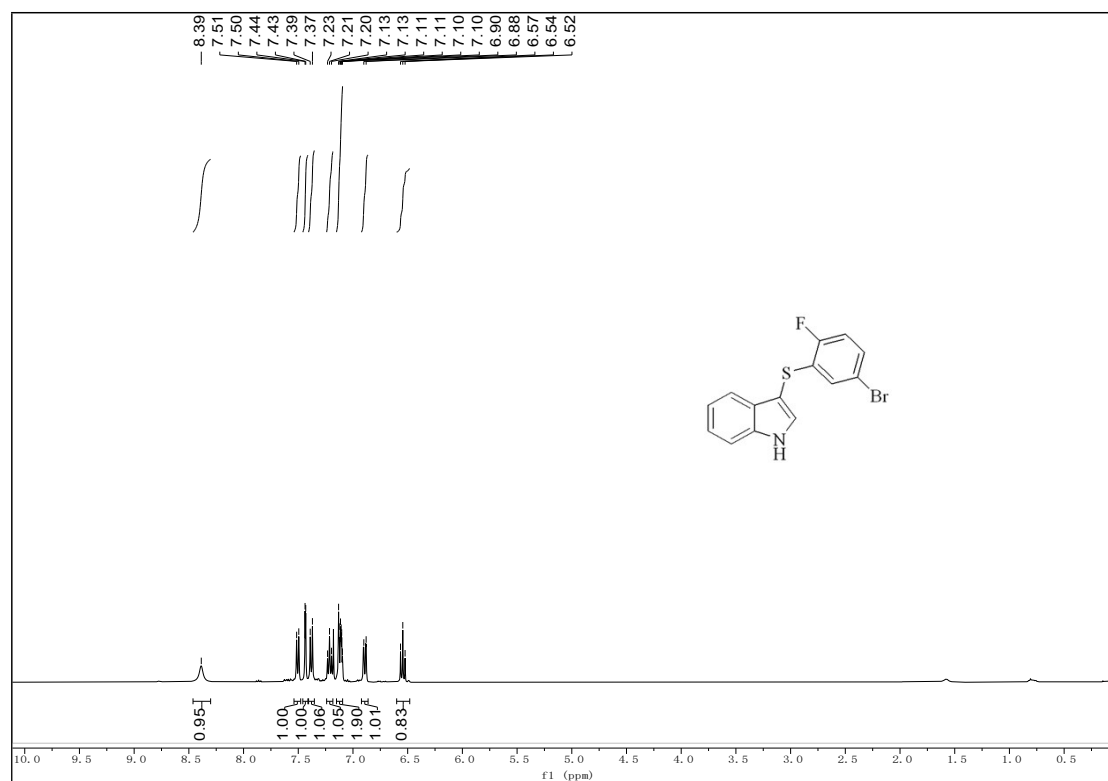

[3-((5-bromo-2-fluorophenyl)thio)-1H-indole] [3n] <sup>13</sup>C NMR (101 MHz, CDCl<sub>3</sub>)

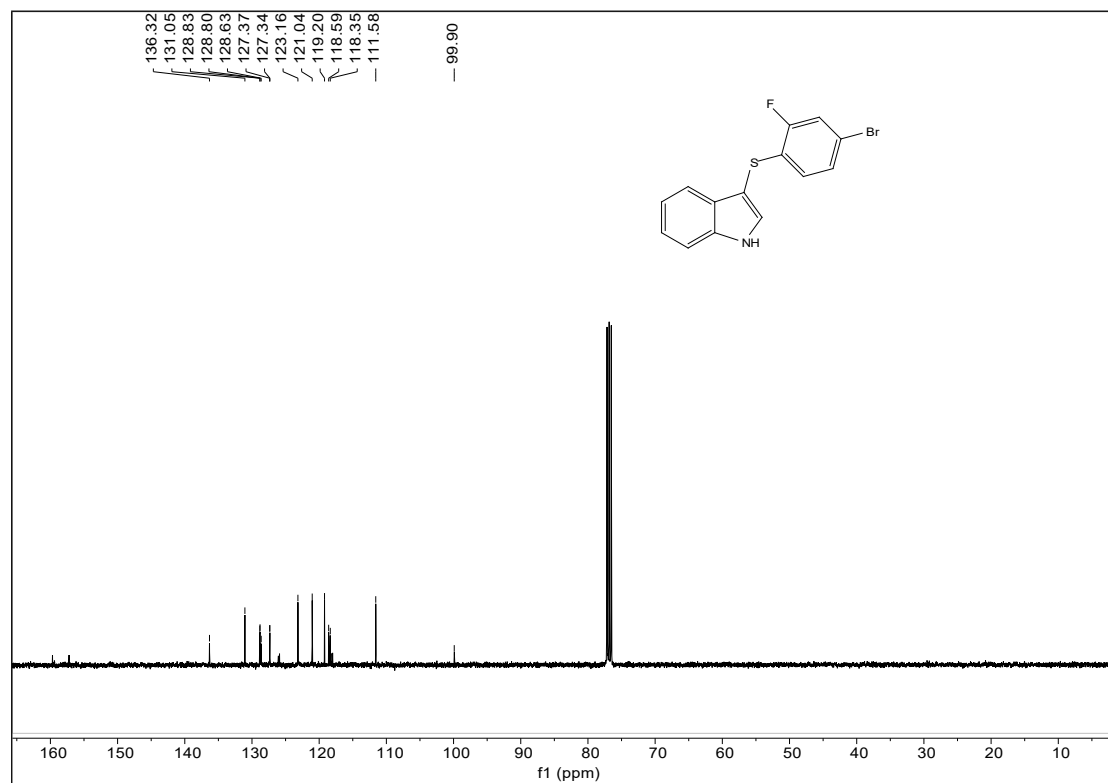

[Methyl 3-(phenylthio)-1H-indole-4-carboxylate] [4a]  $^1\text{H}$  NMR (400 MHz,  $\text{CDCl}_3$ )

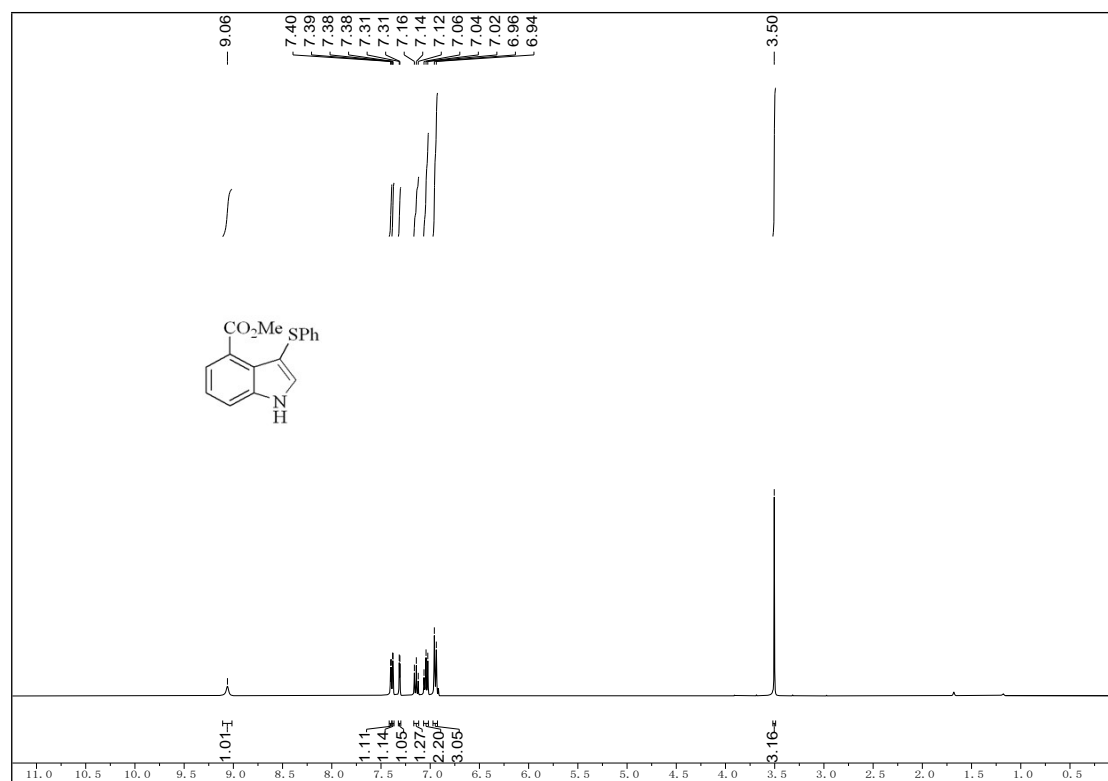

[4-Nitro-3-(phenylthio)-1H-indole] [4b]  $^1\text{H}$  NMR (400 MHz,  $\text{CDCl}_3$ )

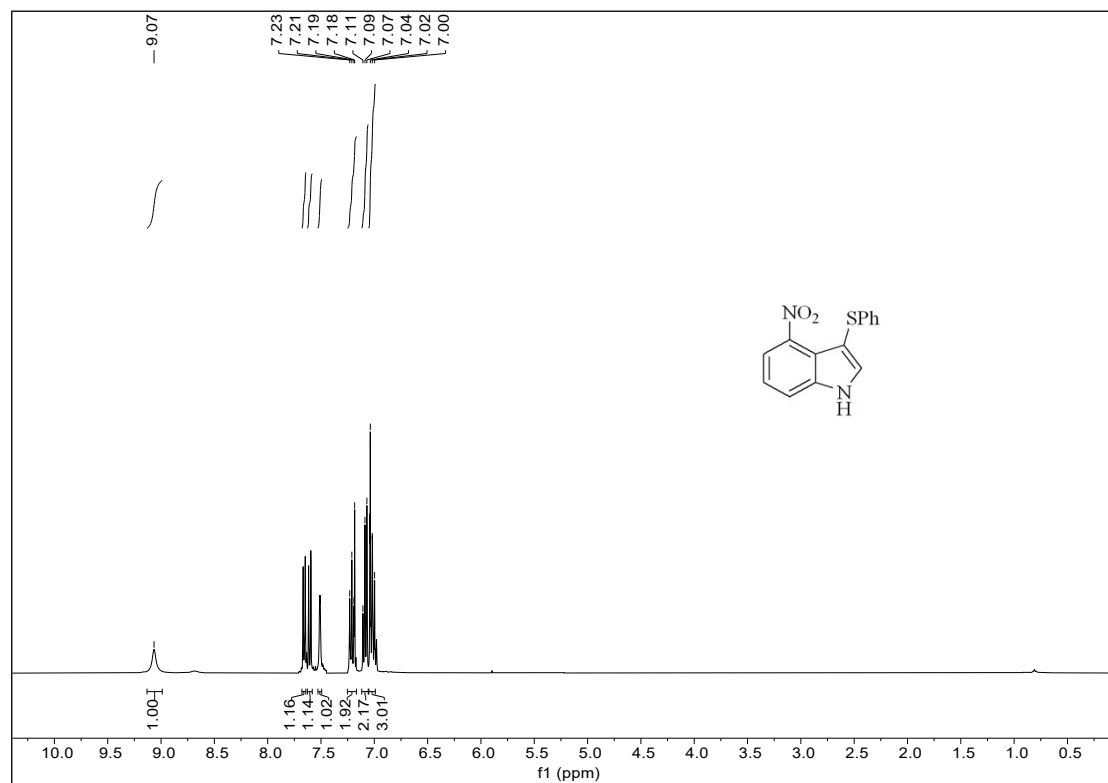

[7-Methyl-3-(phenylthio)-1H-indole] [4d]  $^1\text{H}$  NMR (400 MHz,  $\text{CDCl}_3$ )

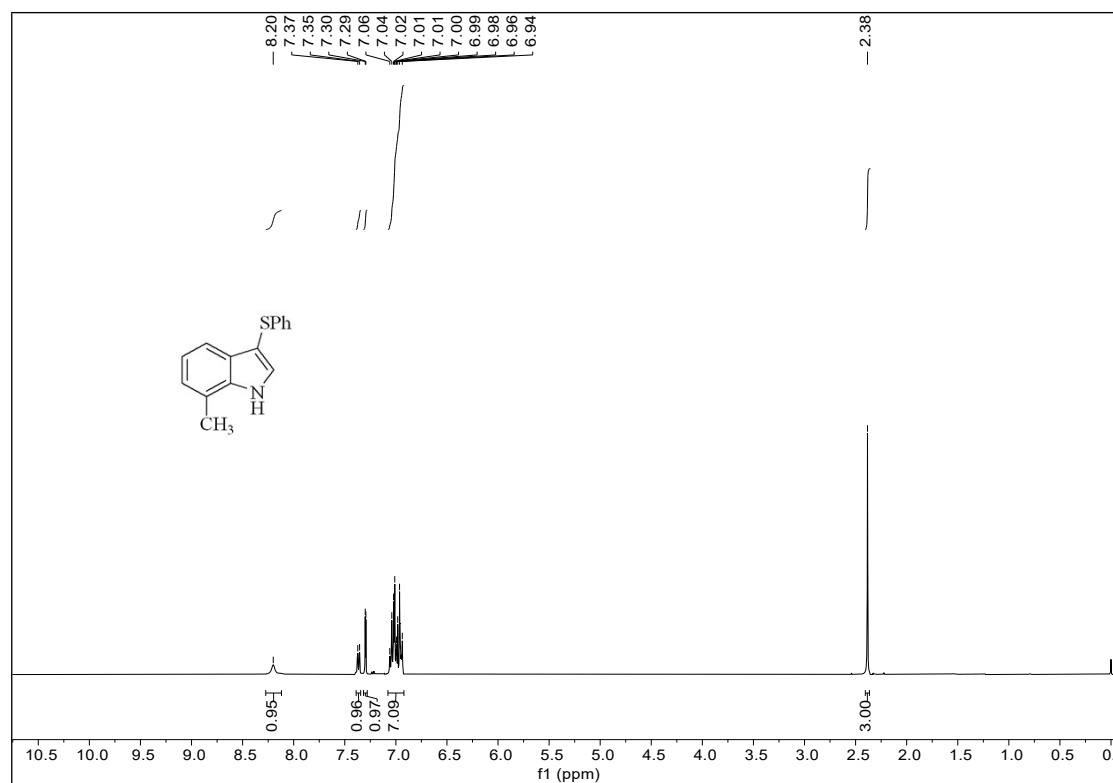

[5-methyl-3-(phenylthio)-1H-indole] [4f]  $^1\text{H}$  NMR (400 MHz,  $\text{CDCl}_3$ )

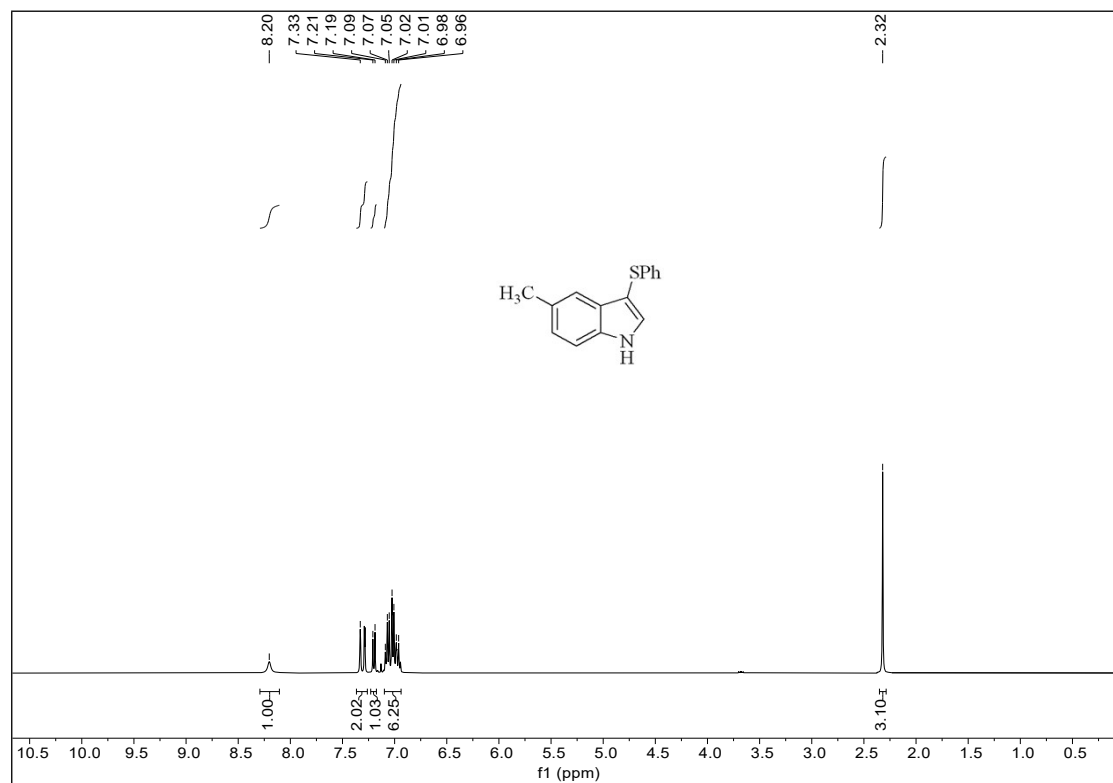

[5-Chloro-3-(phenylthio)-1H-indole] [4g] <sup>1</sup>H NMR (400 MHz, CDCl<sub>3</sub>)

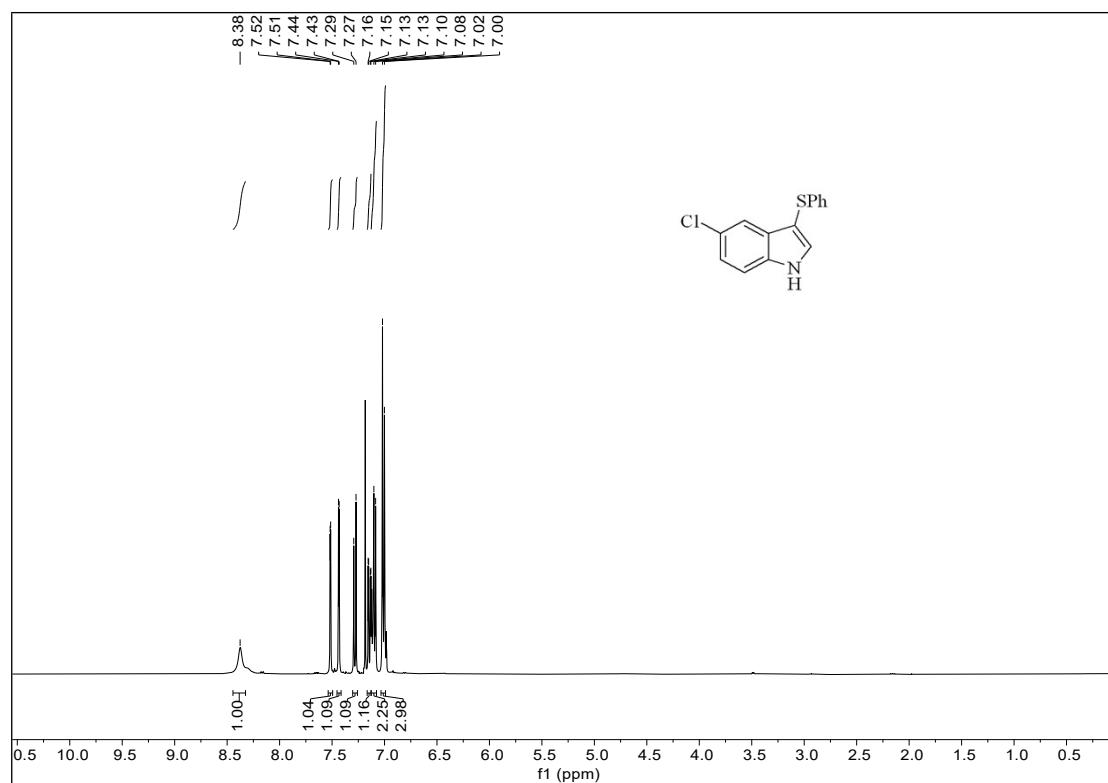

[6-Bromo-3-(phenylthio)-1H-indole] [4h] <sup>1</sup>H NMR (400 MHz, CDCl<sub>3</sub>)

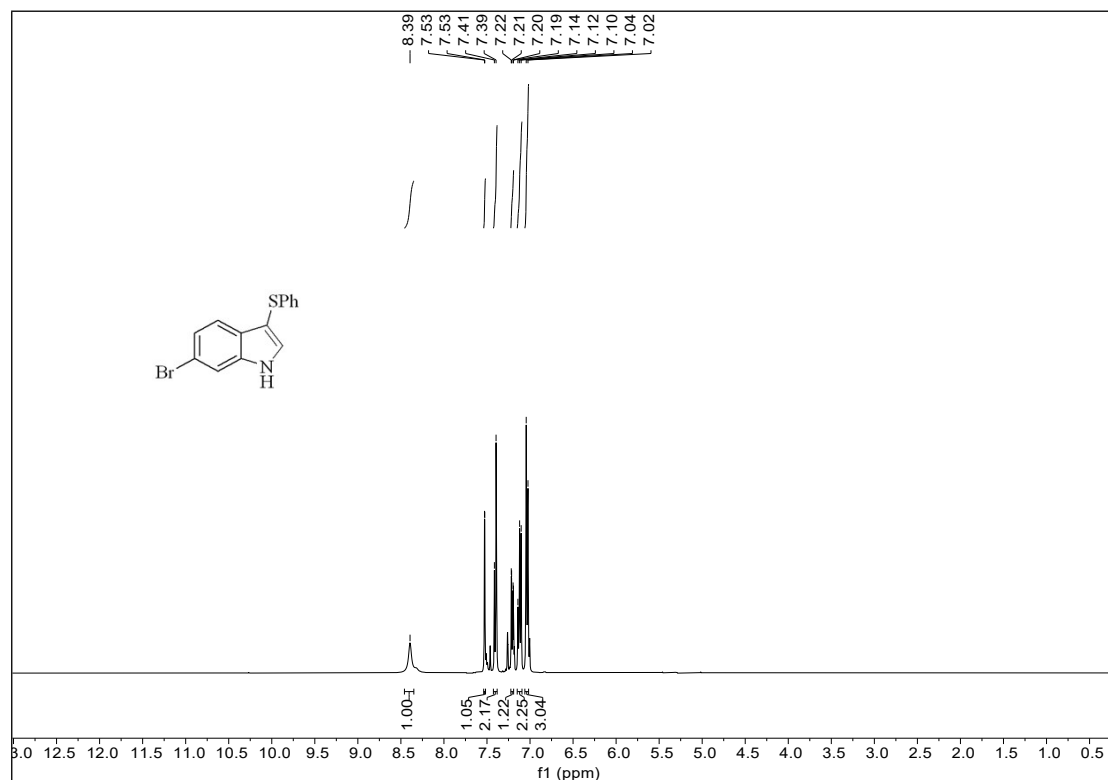

**[6-Fluoro-3-(phenylthio)-1H-indole] [4i]**  $^1\text{H}$  NMR (400 MHz,  $\text{CDCl}_3$ )

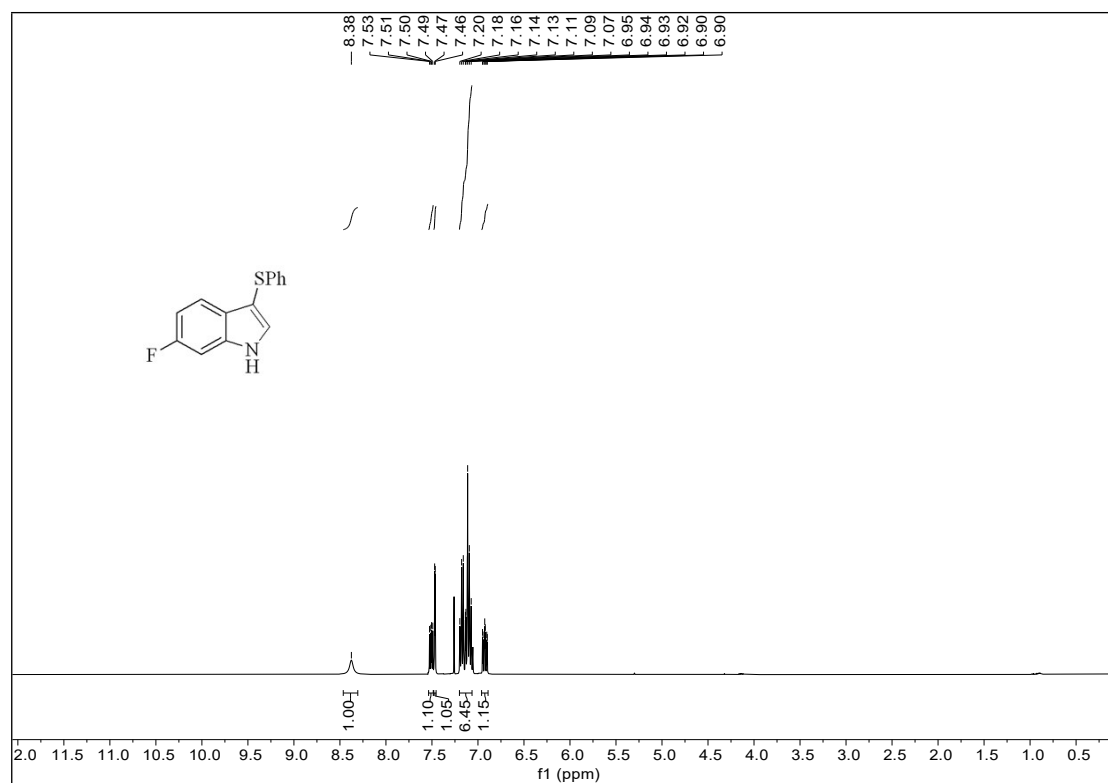

**[2-Methyl-3-(phenylthio)-1H-indole]**  $^1\text{H}$  NMR (400 MHz,  $\text{CDCl}_3$ )

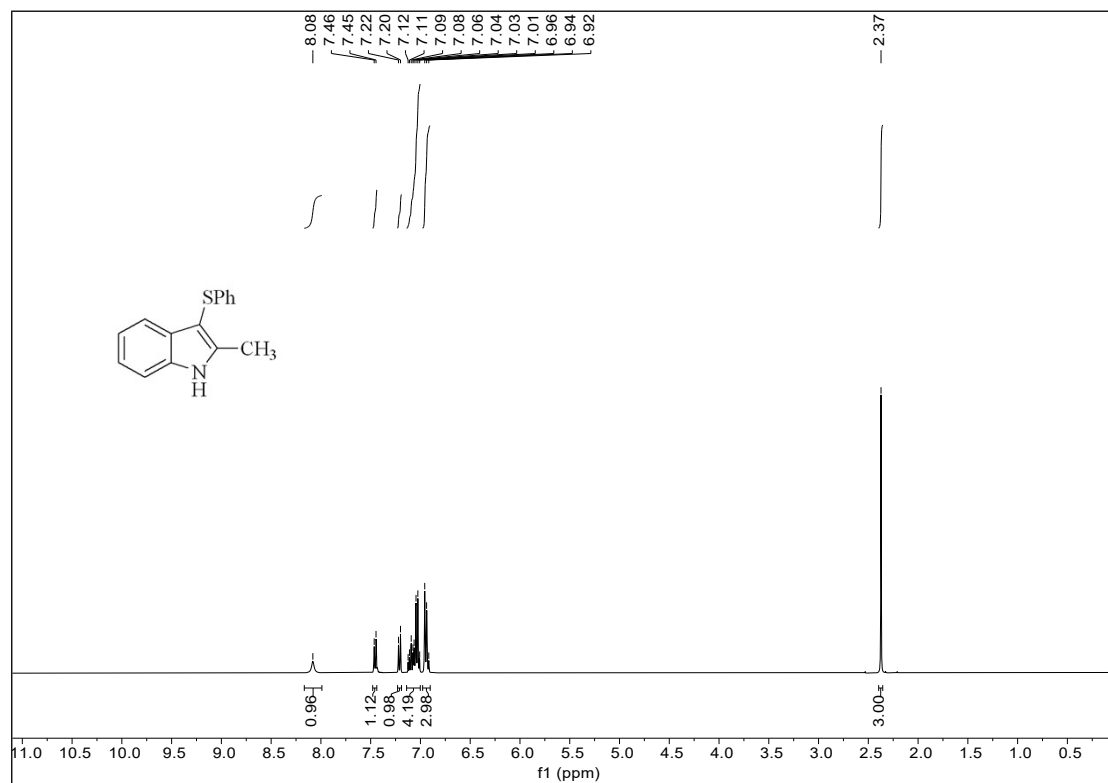

[5-Chloro-2-methyl-3-(phenylthio)-1H-indole] <sup>1</sup>H NMR (400 MHz, CDCl<sub>3</sub>)

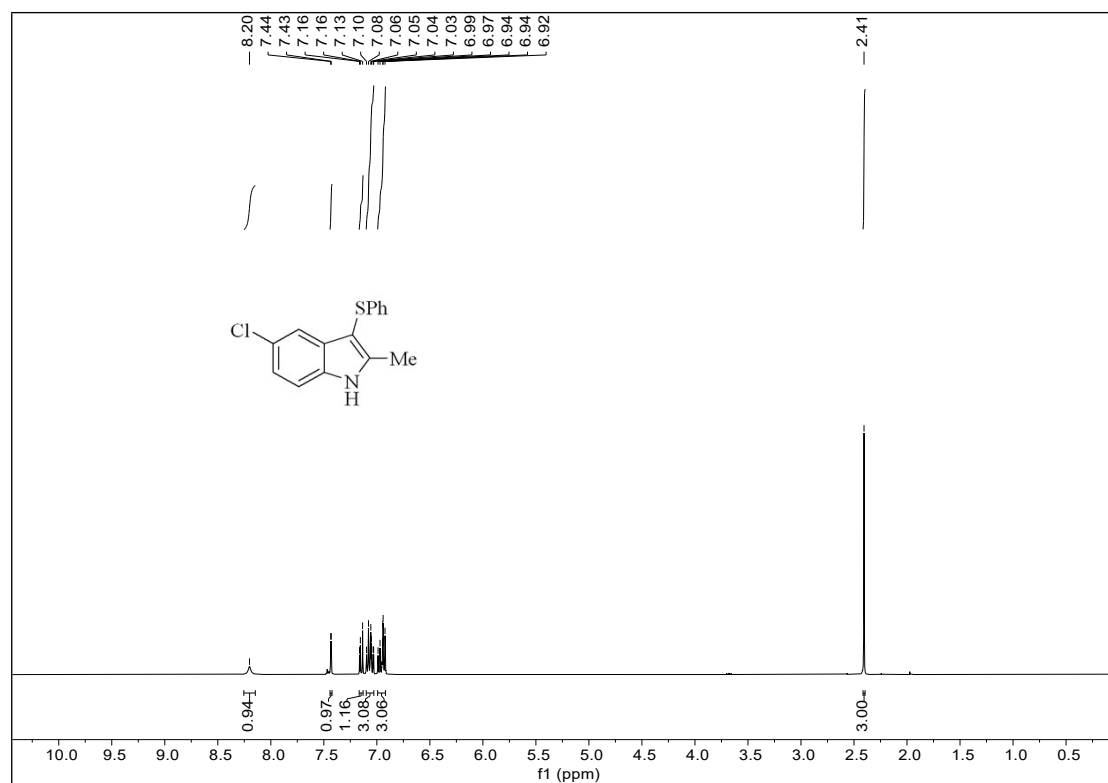

[1-Methyl-3-(phenylthio)-1H-indole] [4] <sup>1</sup>H NMR (400 MHz, CDCl<sub>3</sub>)

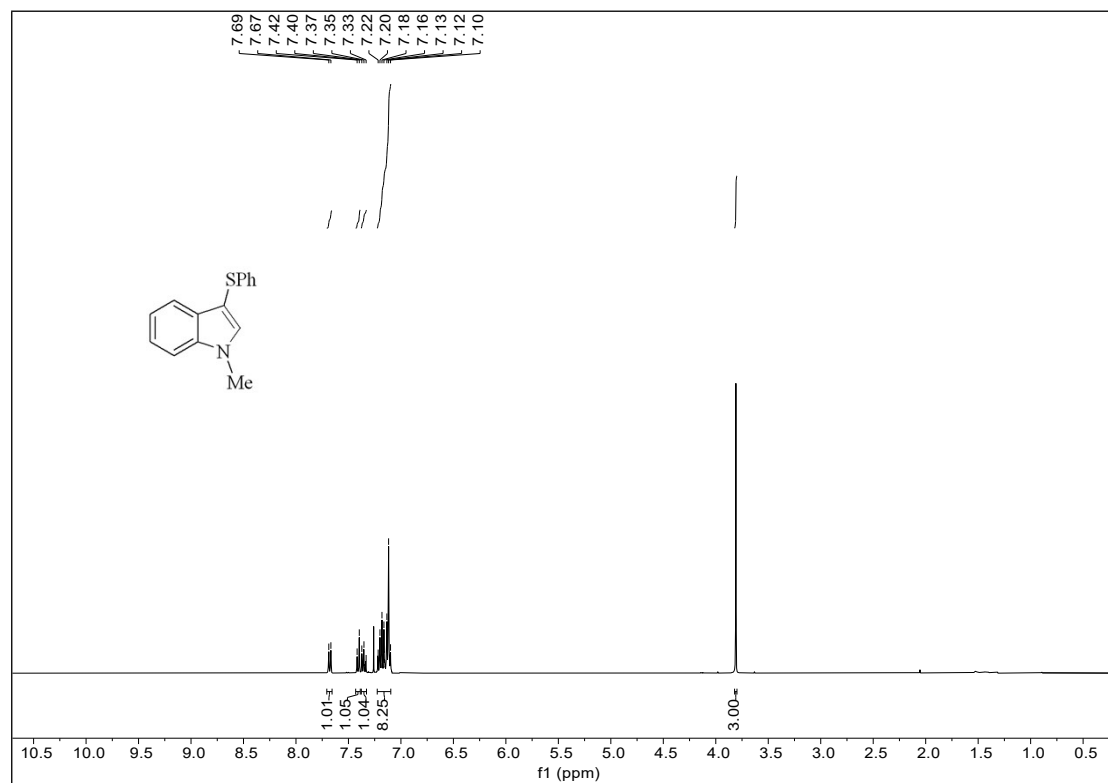



[3-(Phenylthio)-1H-pyrrolo (2,3-b) pyridine] [4m] <sup>1</sup>H NMR (400 MHz, CDCl<sub>3</sub>)

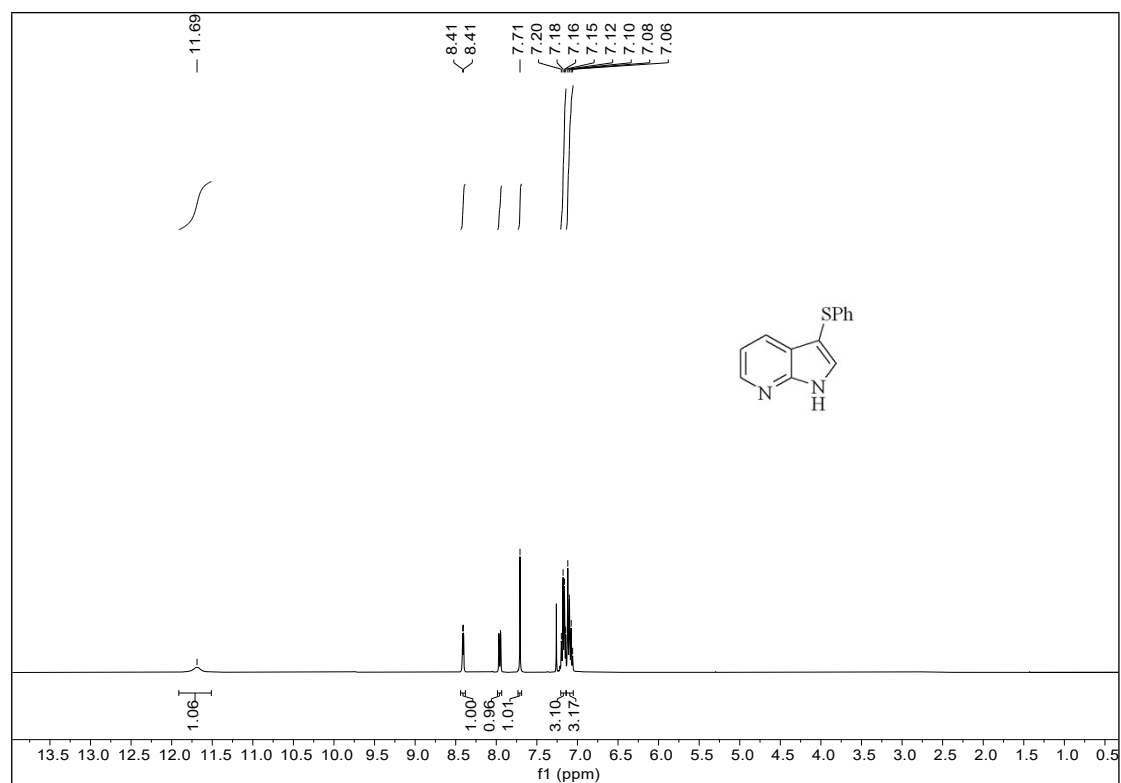

[5-nitro-3-(phenylthio)-1H-indole][4n] <sup>1</sup>H NMR (400 MHz, CDCl<sub>3</sub>)

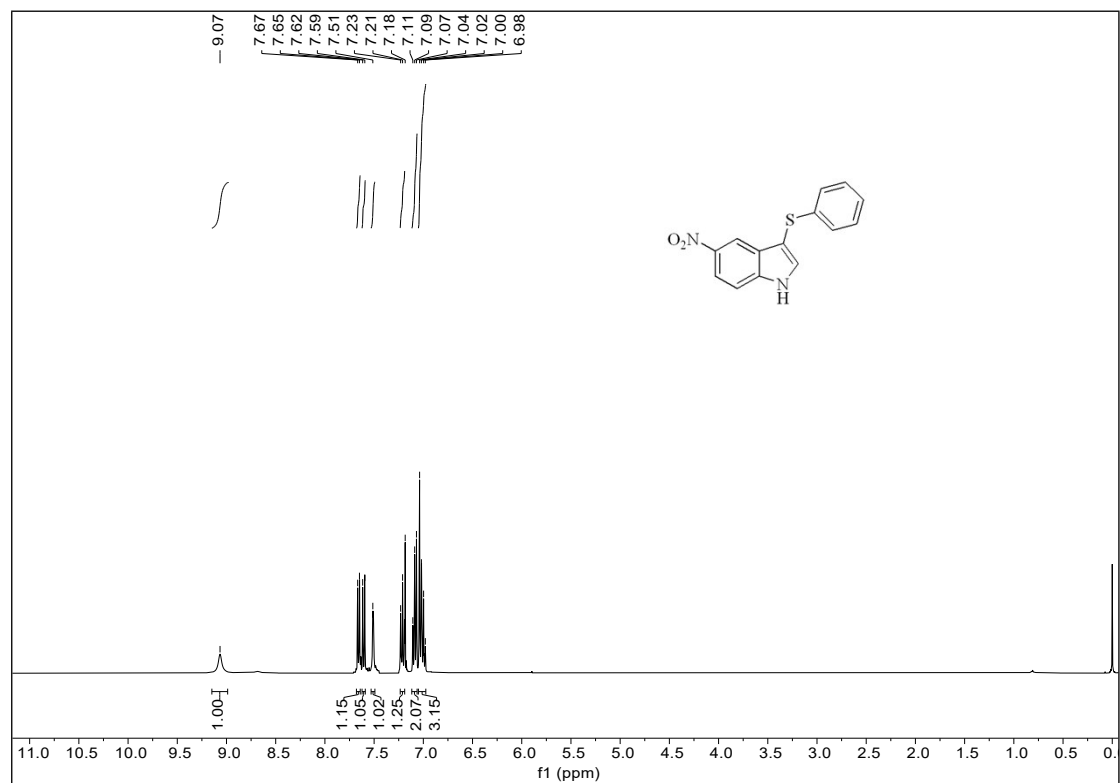

[5-nitro-3-(phenylthio)-1H-indole][4n] <sup>13</sup>C NMR (101 MHz, CDCl<sub>3</sub>)

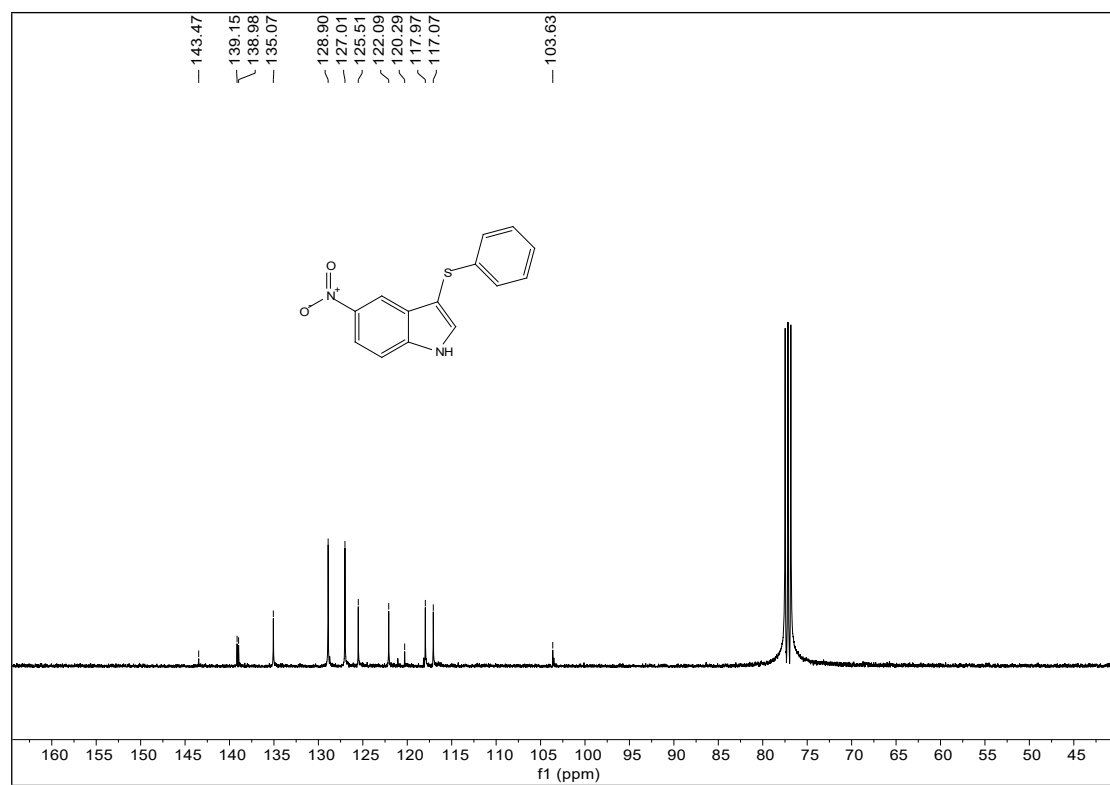

Supplement: d4ra05383d1.pdf [file d4ra05383d1.pdf]
